# Supplementary material for: FOXO3a Potentiates hTERT Gene Expression by Activating c-MYC and Extends the Replicative Life-Span of Human Fibroblast
Source: PubMed Central journal article supplement (PMC4085005; doi:10.1371/journal.pone.0101864), 2014-07-07
Supplement: pone.0101864.s001.pdf [file pone.0101864.s001.pdf]

Supplemental Data

Figure S1

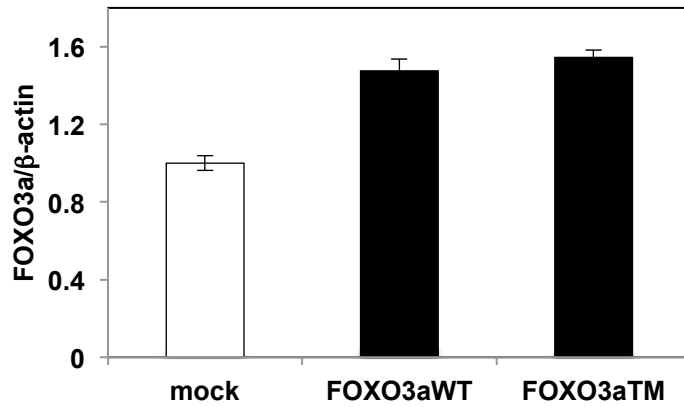

Fig. S1. FOXO3a expression level in recombinant HUC-F2 cells. The FOXO3a expression in HUC-F2 cells transduced with FOXO3aWT, FOXO3aTM or mock were assessed by qPCR in triplicate using primers specific for FOXO3a (5'-TTGAAGCGGATGCCCAAATAA-3' and 5'-ACGTATTTCTGGAGTGTGGCAAGAG-3') and for  $\beta$ -actin, and normalized to the corresponding  $\beta$ -actin level.
