# Supplementary material for: FOXO3a Potentiates hTERT Gene Expression by Activating c-MYC and Extends the Replicative Life-Span of Human Fibroblast
Source: PubMed Central journal article supplement (PMC4085005; doi:10.1371/journal.pone.0101864), 2014-07-07
Supplement: pone.0101864.s003.pdf [file pone.0101864.s003.pdf]

Supplemental Data

Fig. S3.

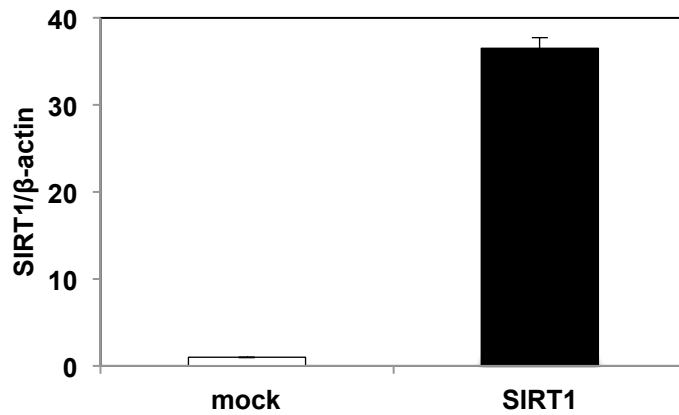

Fig. S3. SIRT1 expression level in recombinant HUC-F2 cells. The SIRT1 expression level in HUC-F2 cells transduced with SIRT1 or mock were assessed by qPCR in triplicate using primers specific for SIRT1 (5'-GCCTCACATGCAAGCTCTAGTGAC-3' and 5'-TTCGAGGATCTGTGCCAATCATAA-3') and for  $\beta$ -actin, and normalized to the corresponding  $\beta$ -actin level.
