# Supplementary material for: FOXO3a Potentiates hTERT Gene Expression by Activating c-MYC and Extends the Replicative Life-Span of Human Fibroblast
Source: PLOS journal article supplement (doi:10.1371/journal.pone.0101864), 2014-07-07
Supplement: S2 (10.1371/journal.pone.0101864.s002) [file journal.pone.0101864.s002]

Supplemental Data

Fig. S2.

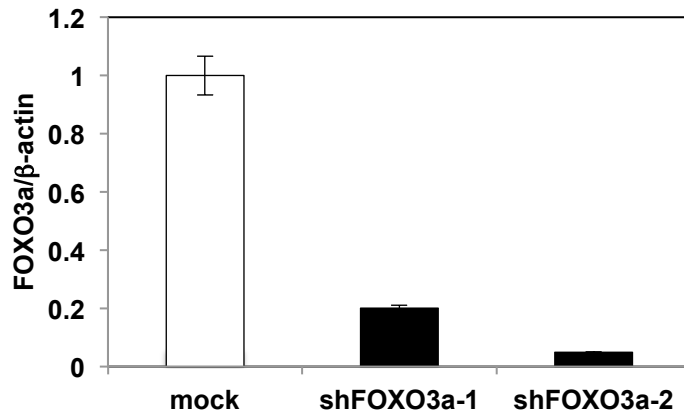

Fig. S2. FOXO3a expression level in HUC-F2 cells transduced with shRNA against FOXO3a. The FOXO3a expression in HUC-F2 cells transduced with shFOXO3a-1, shFOXO3a-2 or mock were assessed by qPCR as described above.
